# Supplementary material
Source: PubMed Central journal article supplement (PMC3807574)
Supplement: NIHMS384209-supplement.pdf [file NIHMS384209-supplement.pdf]

**Table S1.** Baseline tumour characteristics and distribution.

| <b>Tumor</b>         | <b>N (%)</b>   |                  |
|----------------------|----------------|------------------|
| Multifocal           | 38(81%)        |                  |
| Solitary             | 9(19%)         |                  |
| Bilobar              | 28(59.6%)      |                  |
| Unilobar             | 19(40.4%)      |                  |
| Metastasis (Distant) | 6(12.8%)       |                  |
| Cumulative Size      | Mean<br>9.7 cm | Median<br>8.8 cm |

**Table S2.** Treatment profile.

| <b>Transarterial treatment</b>                  | <b>N (%)</b> |
|-------------------------------------------------|--------------|
| LC Bead TACE                                    | 40 (85.1%)   |
| LC Bead and Sirtex                              | 6 (12.8%)    |
| Sirtex                                          | 1 (2.13%)    |
| Median number of treatments per patient (range) | 3 (1-3)      |
